# Supplementary material
Source: HighWire-hosted journal article supplement (https://bmjopen.bmj.com/content/10/12/e041295)

**Figure S2: 30-day absolute risk of death, stratified by normal/elevated ranges, and adjusted for age and gender.**

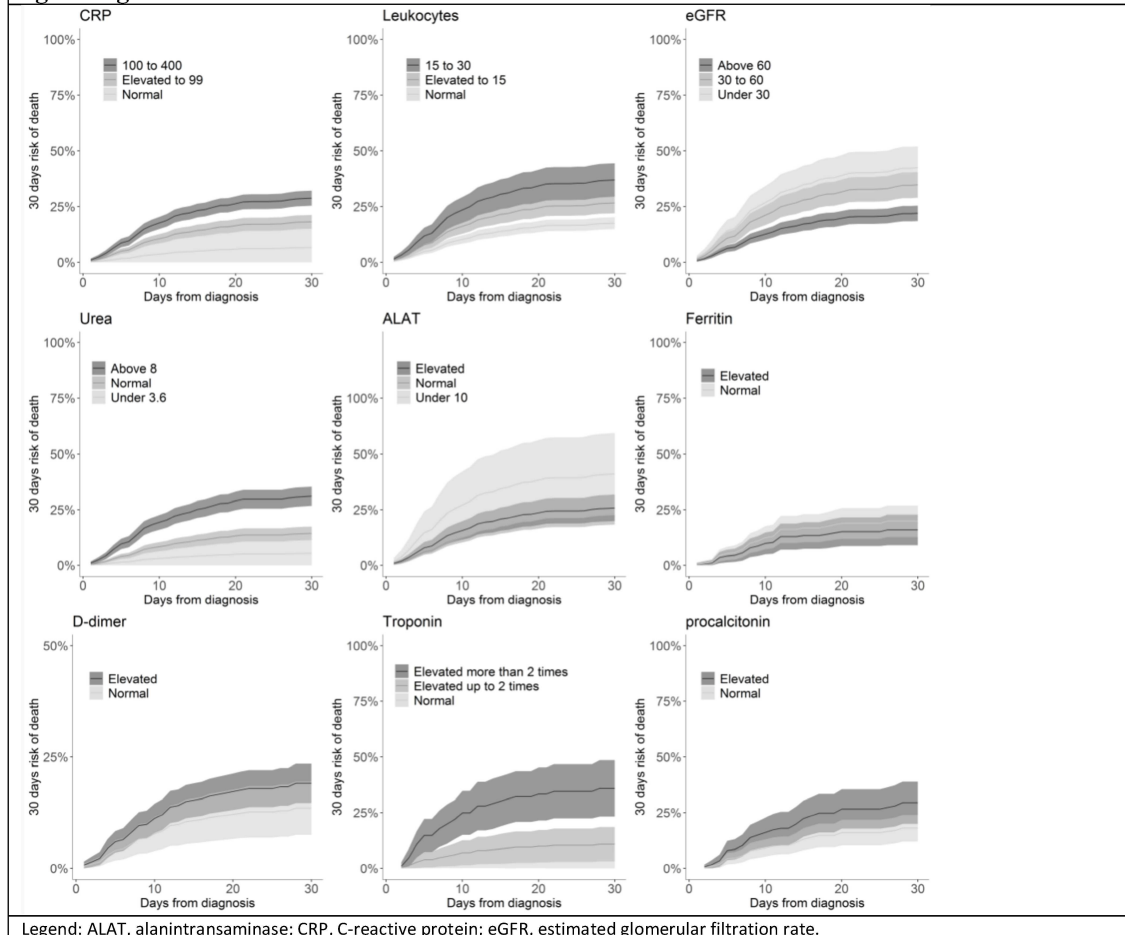

Supplement: inline-supplementary-material-4 [file inline-supplementary-material-4.pdf]
